# Supplementary material
Source: PubMed Central journal article supplement (PMC3028701)

# Base Peak Chromatogram of PI (+204)-IDA for ssMBP LysC Digests

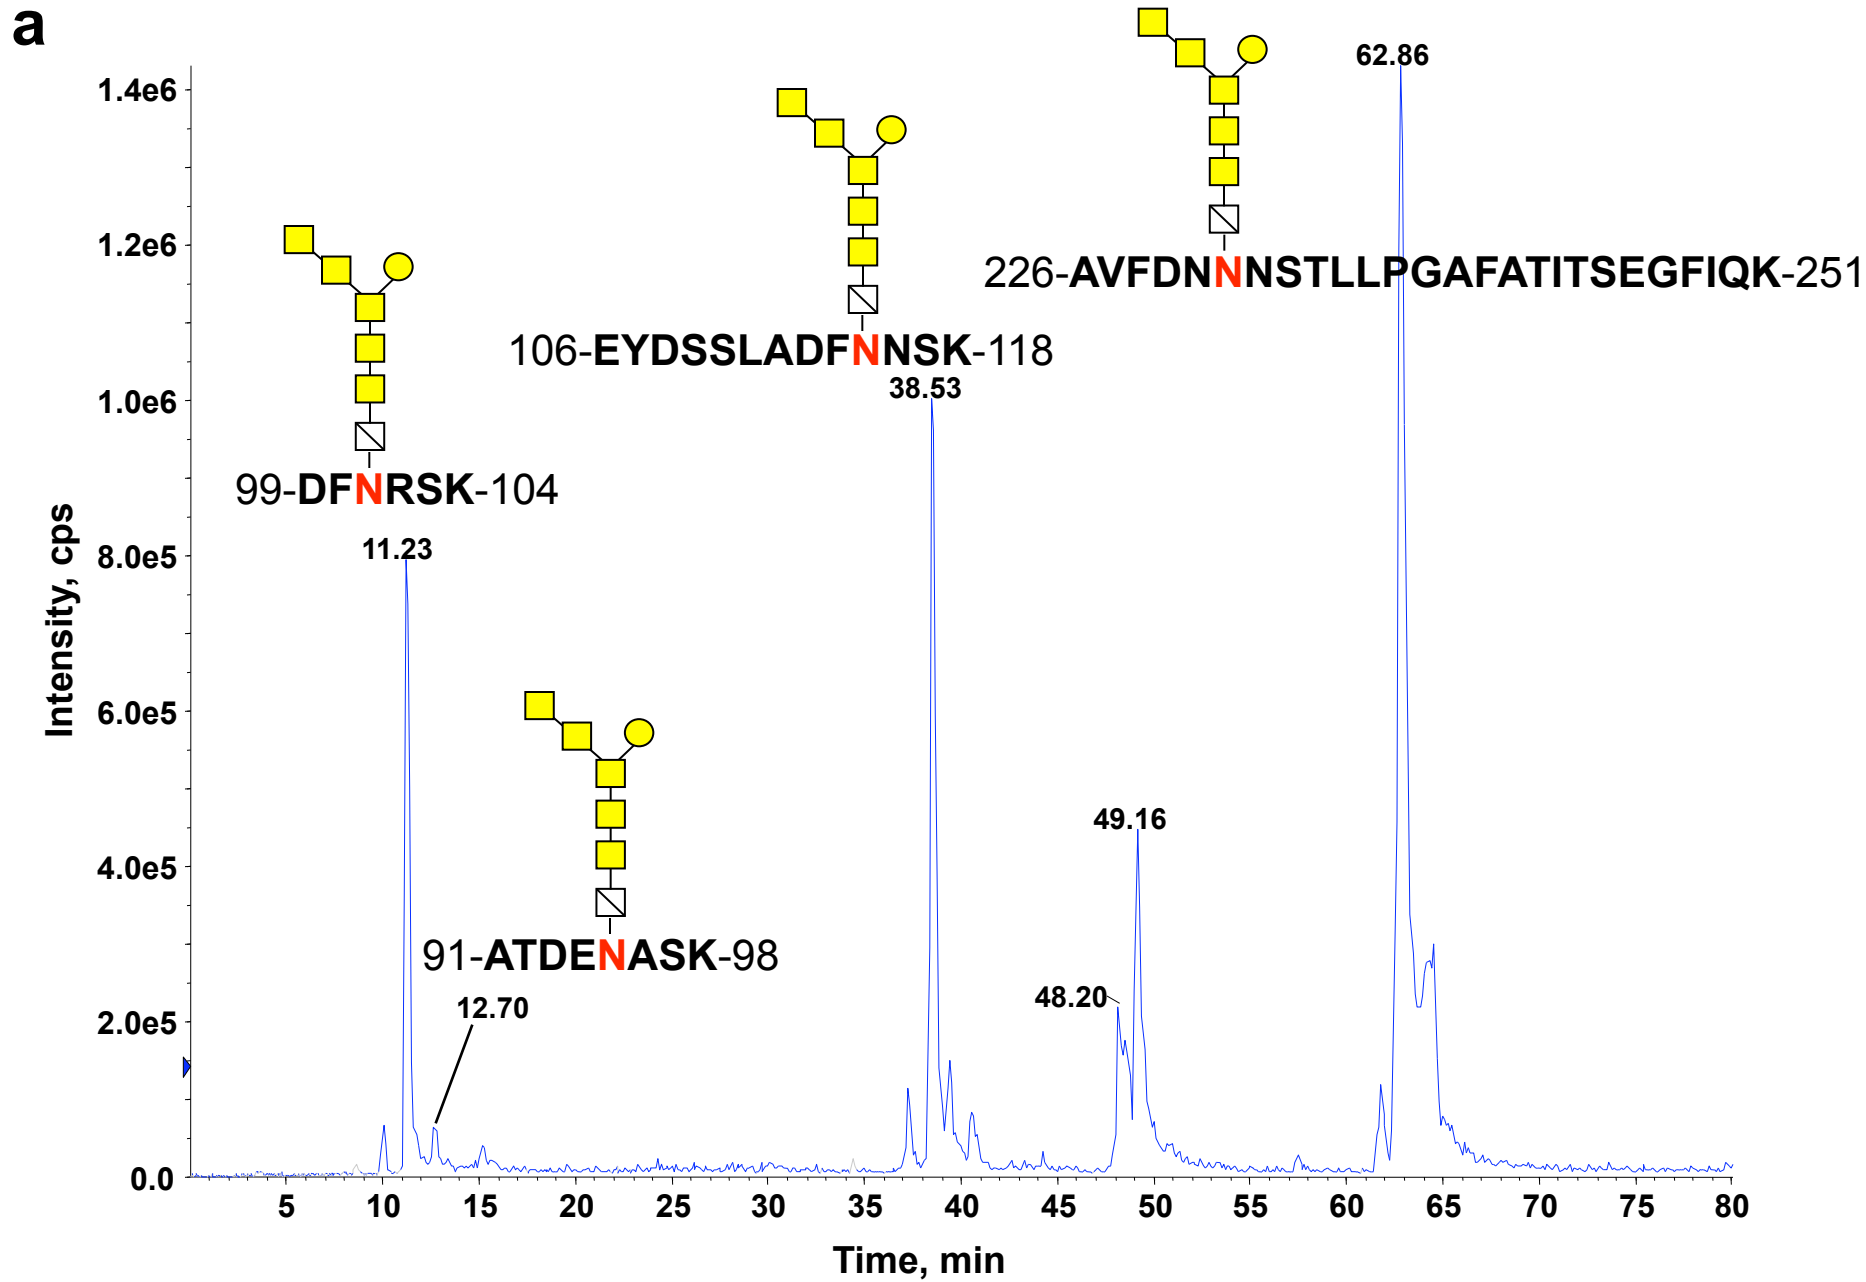

# MS Spectra of NanoLC-PI Scan (+204) at 11.2 and 12.7-min Elution

**b**

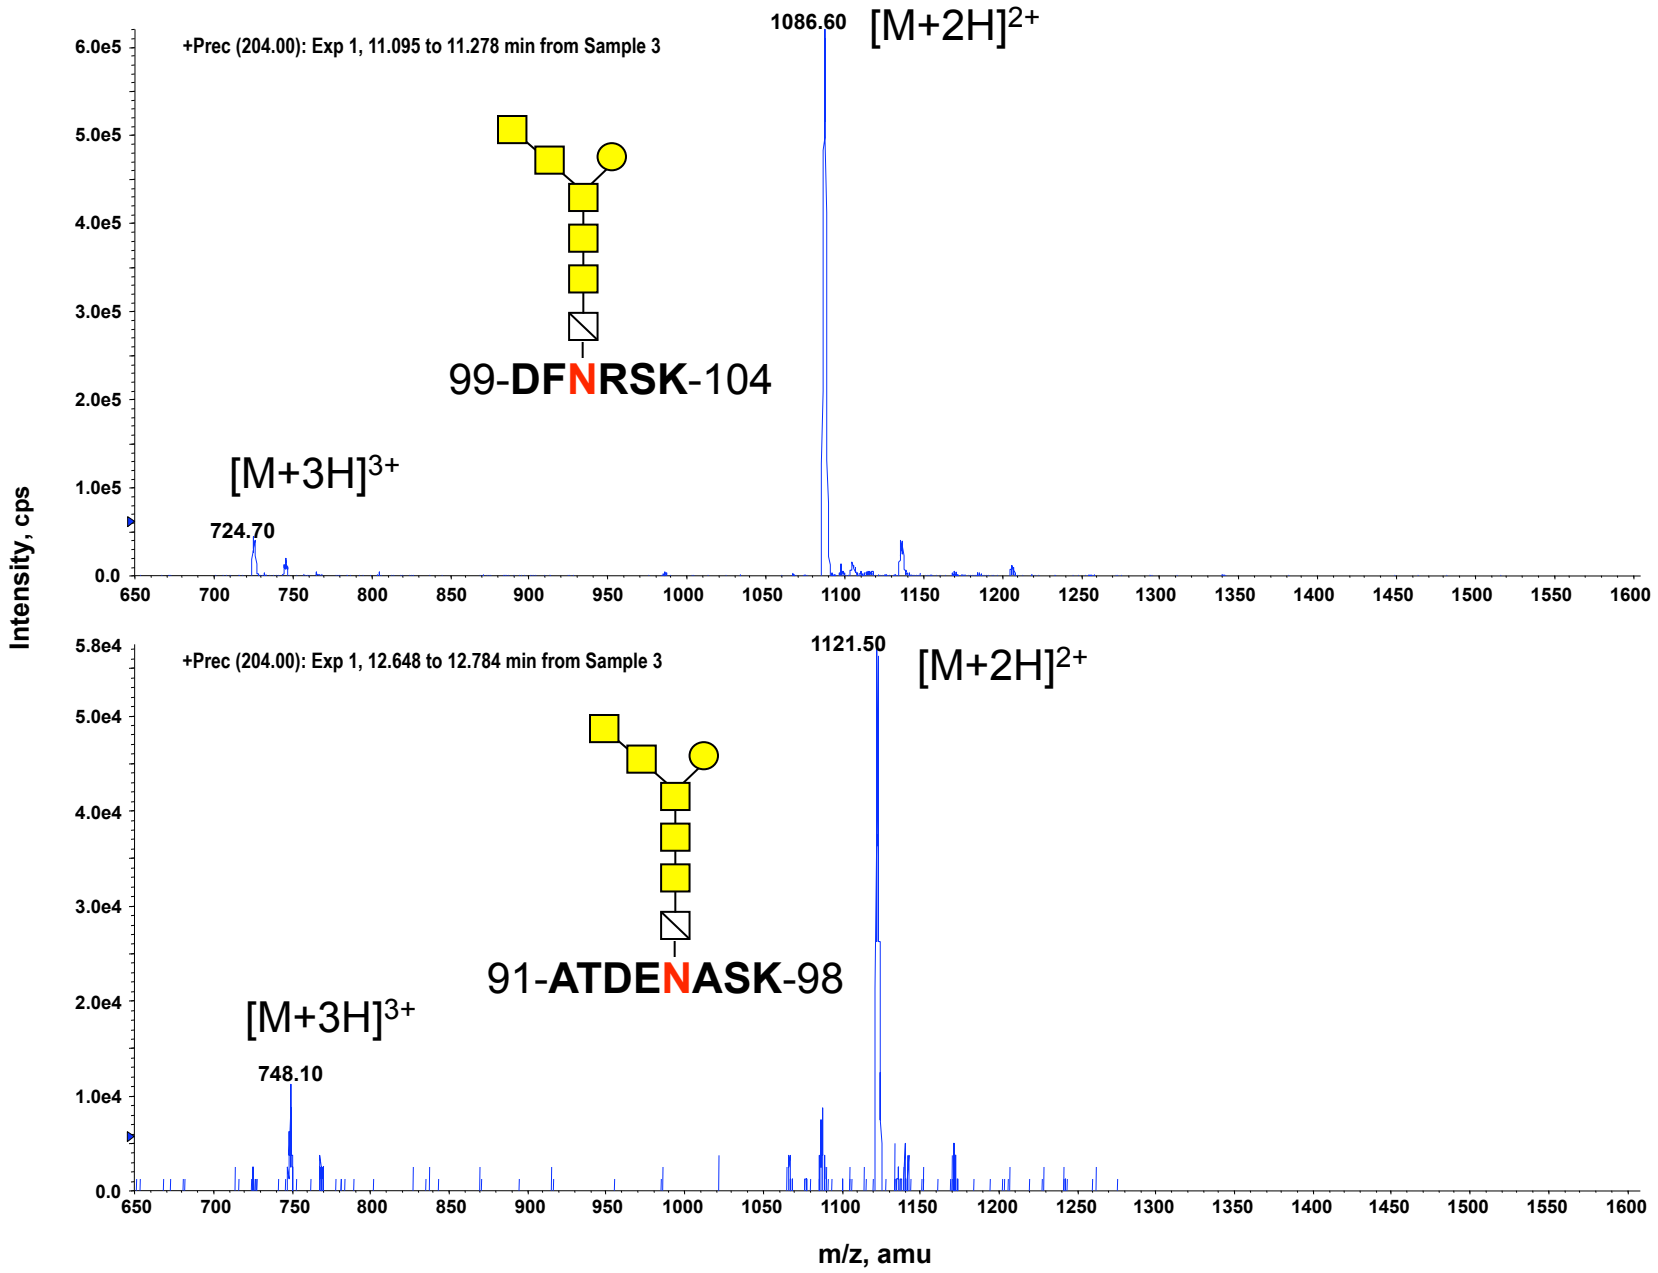

# MS Spectra of NanoLC-PI Scan (+204) at 38.5 and 62.8-min Elution

C

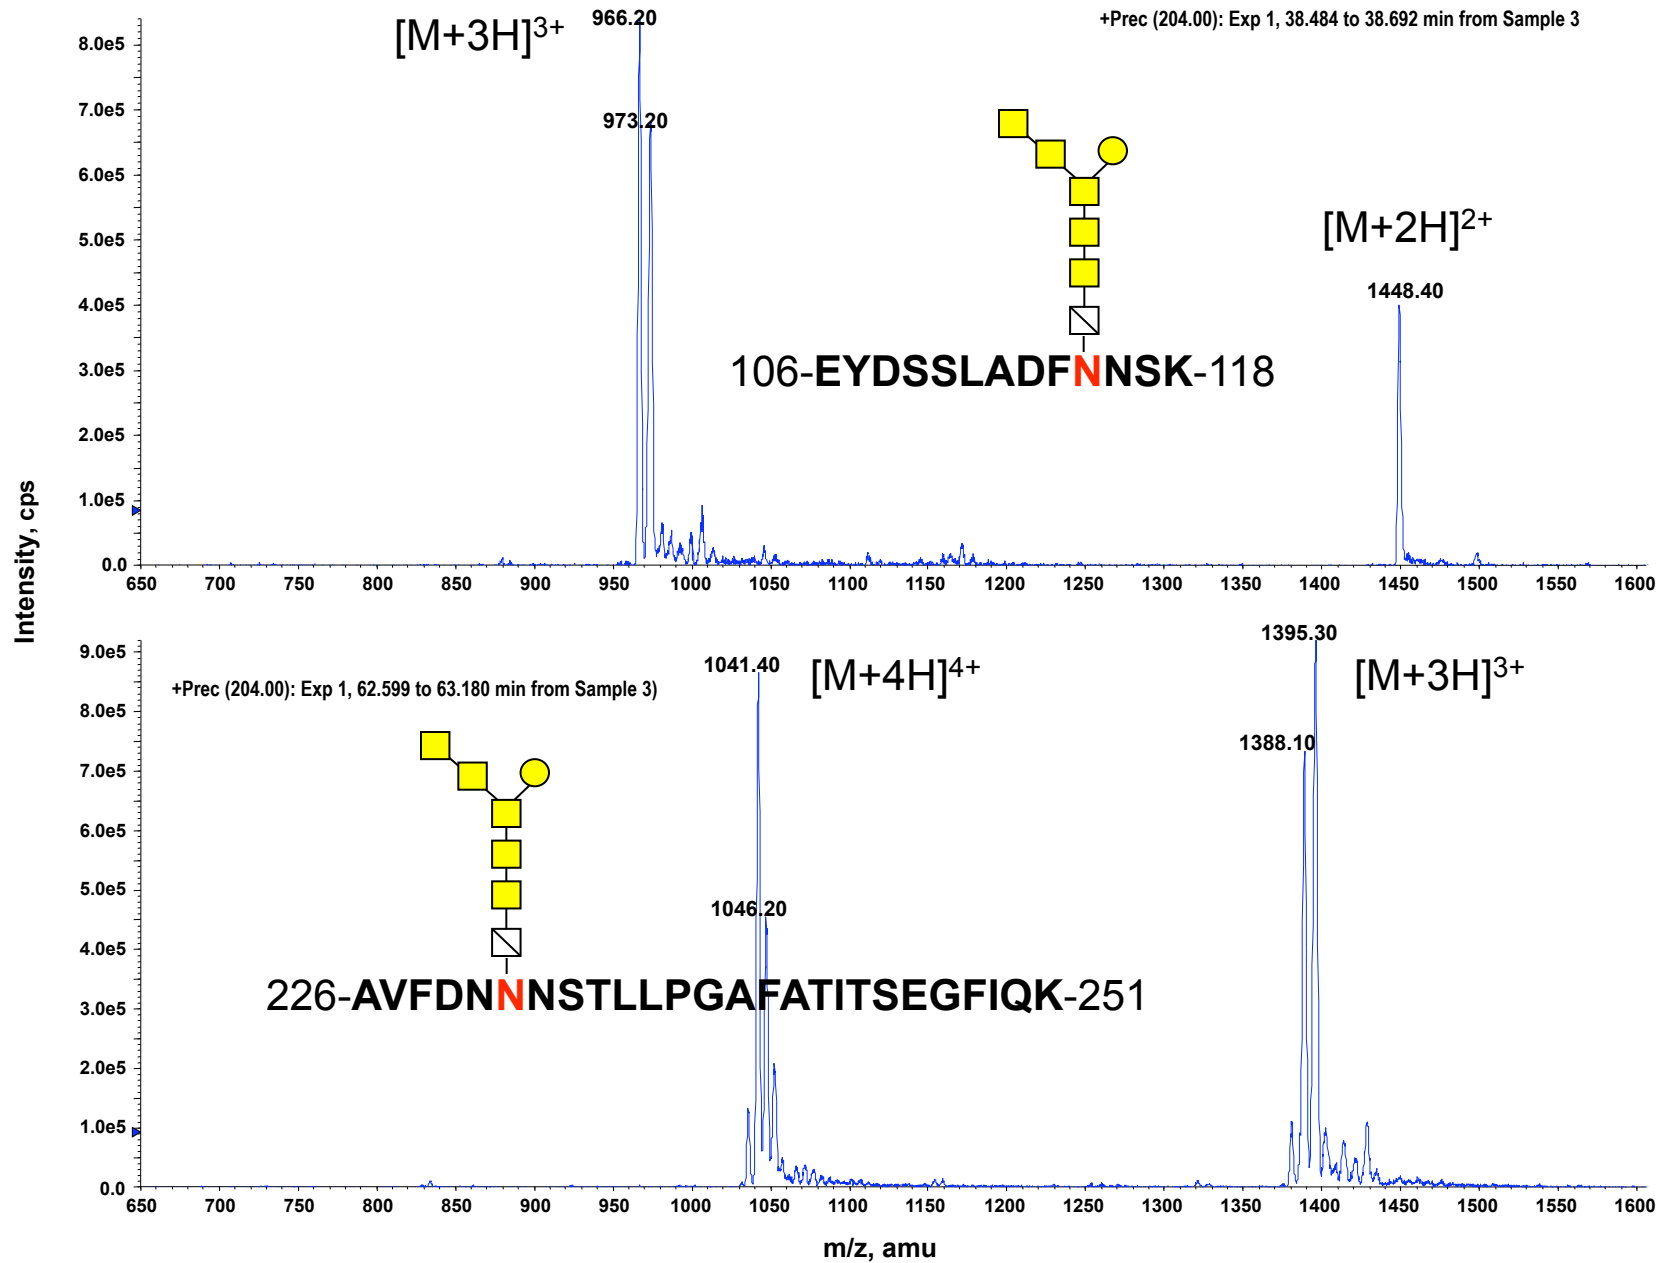

# MS/MS Spectrum of a $m/z$ 1086.6<sup>2+</sup> Ion Confirming N<sup>101</sup>-glycopeptide

d

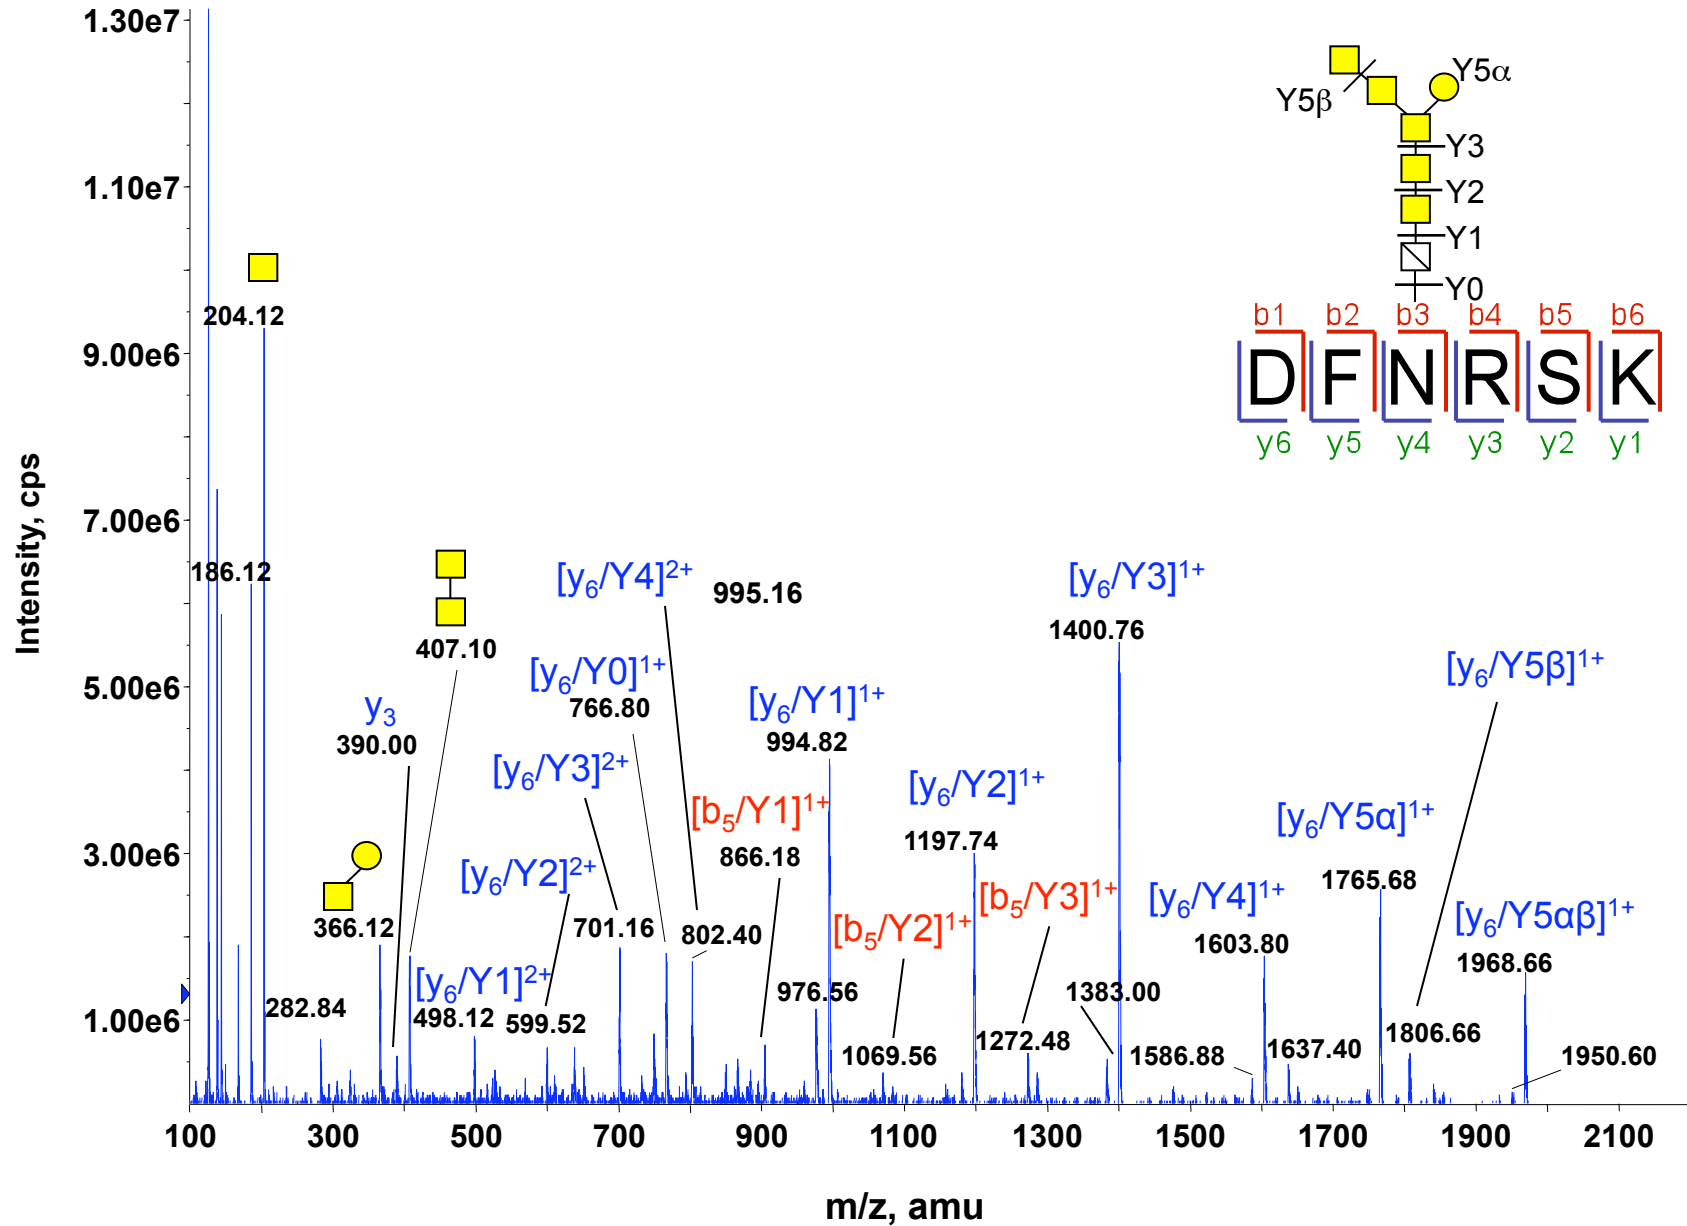

# MS/MS Spectrum of a $m/z$ 1121.6<sup>2+</sup> Ion Confirming N<sup>95</sup>-glycopeptide

e

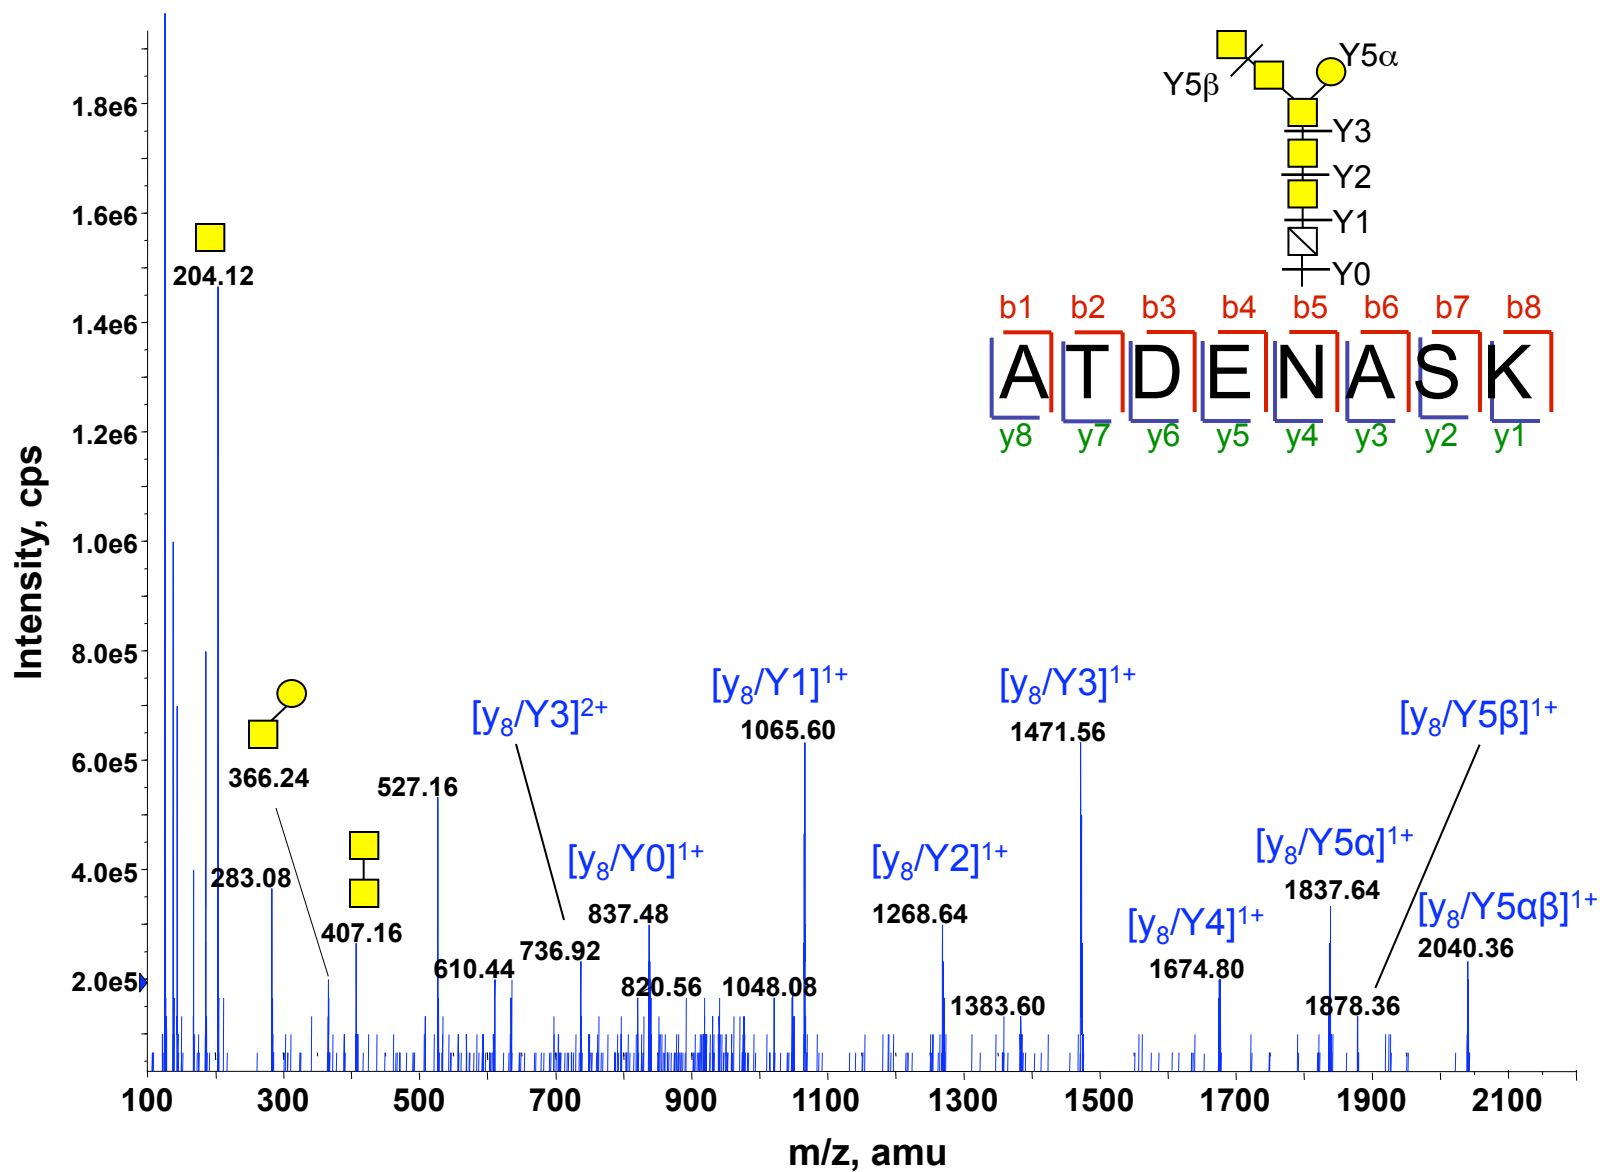

# MS/MS Spectrum of a $m/z$ 1448.5<sup>2+</sup> Ion Confirming N<sup>15</sup>-glycopeptide

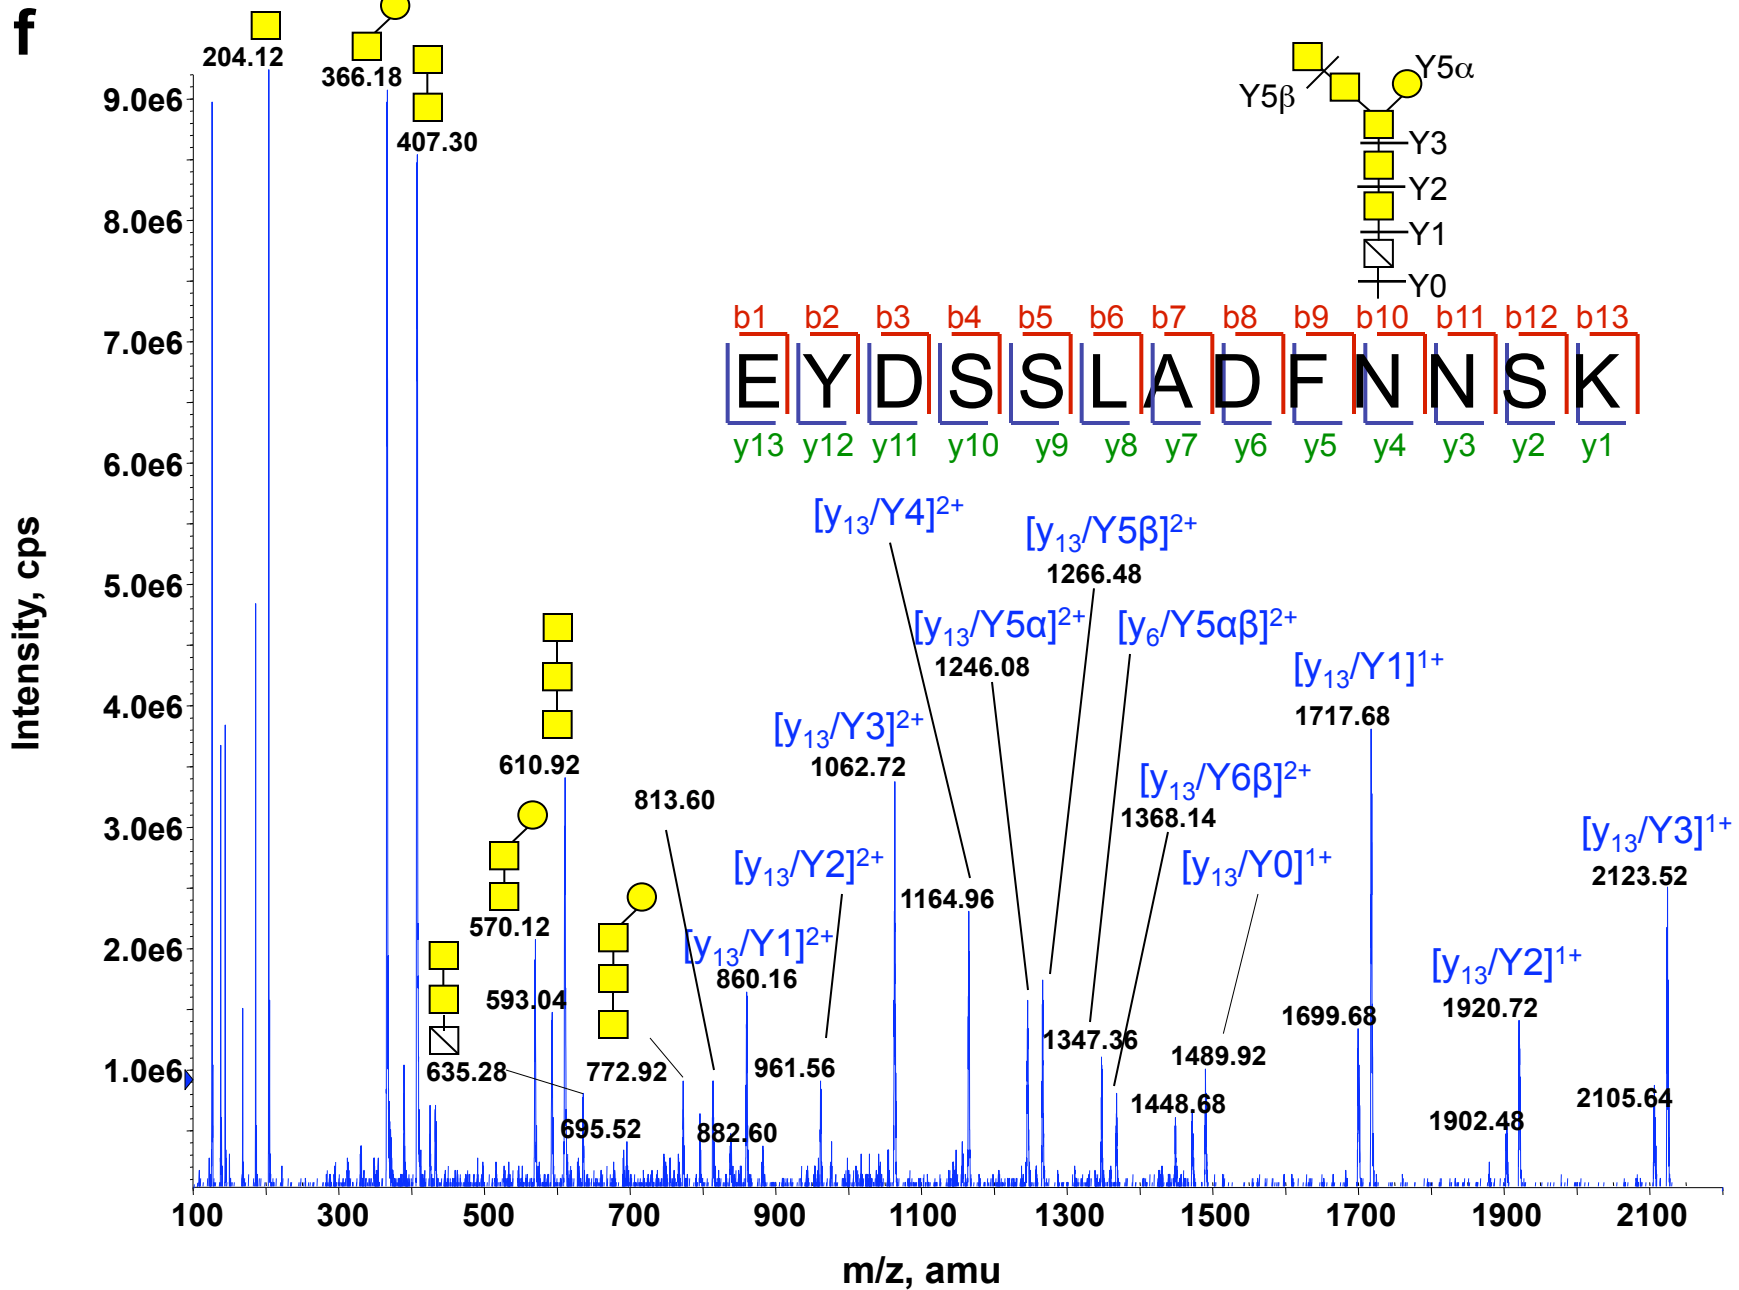

# MS/MS Spectrum of a $m/z$ 1041.2<sup>4+</sup> Ion Confirming N<sup>231</sup>-glycopeptide

g

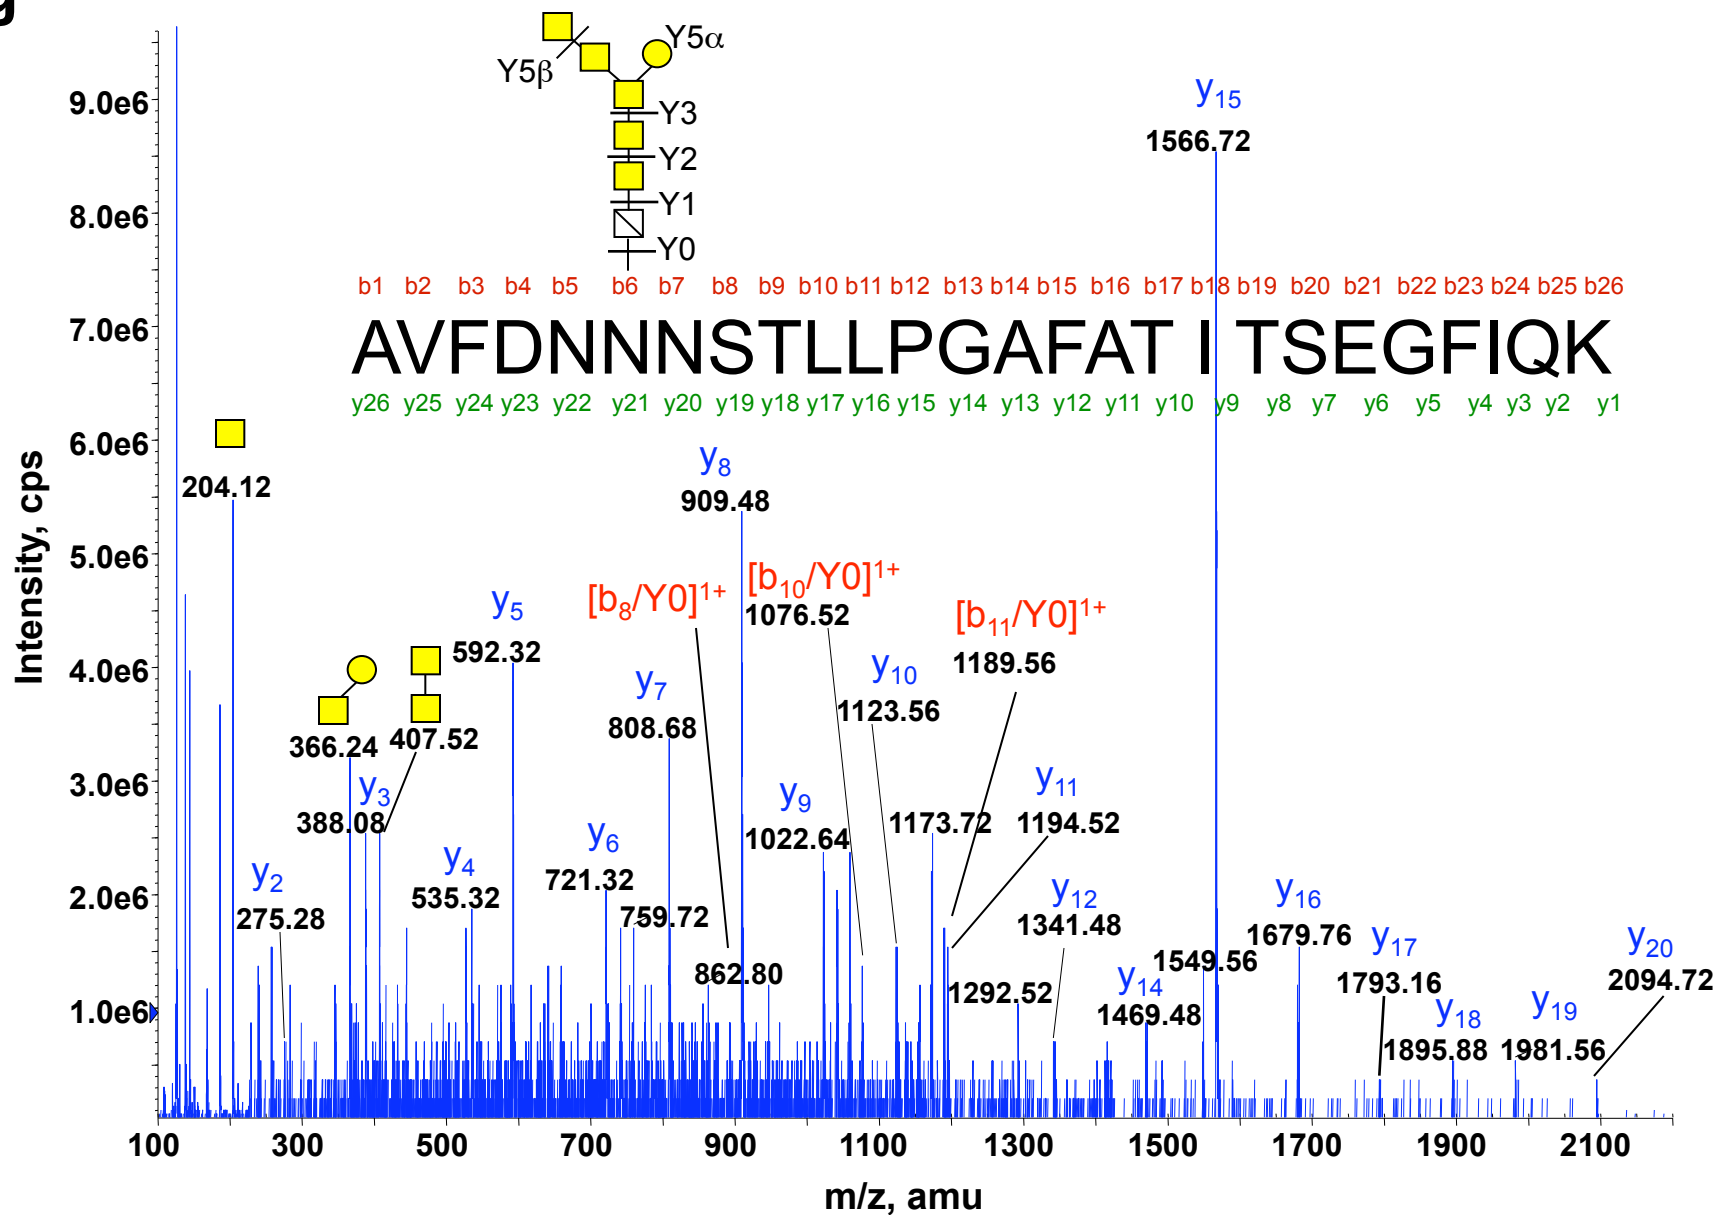

Supplement: supp_77_3_871__2.pdf [file supp_77_3_871__2.pdf]
