# Supplementary material
Source: PubMed Central journal article supplement (PMC3028701)

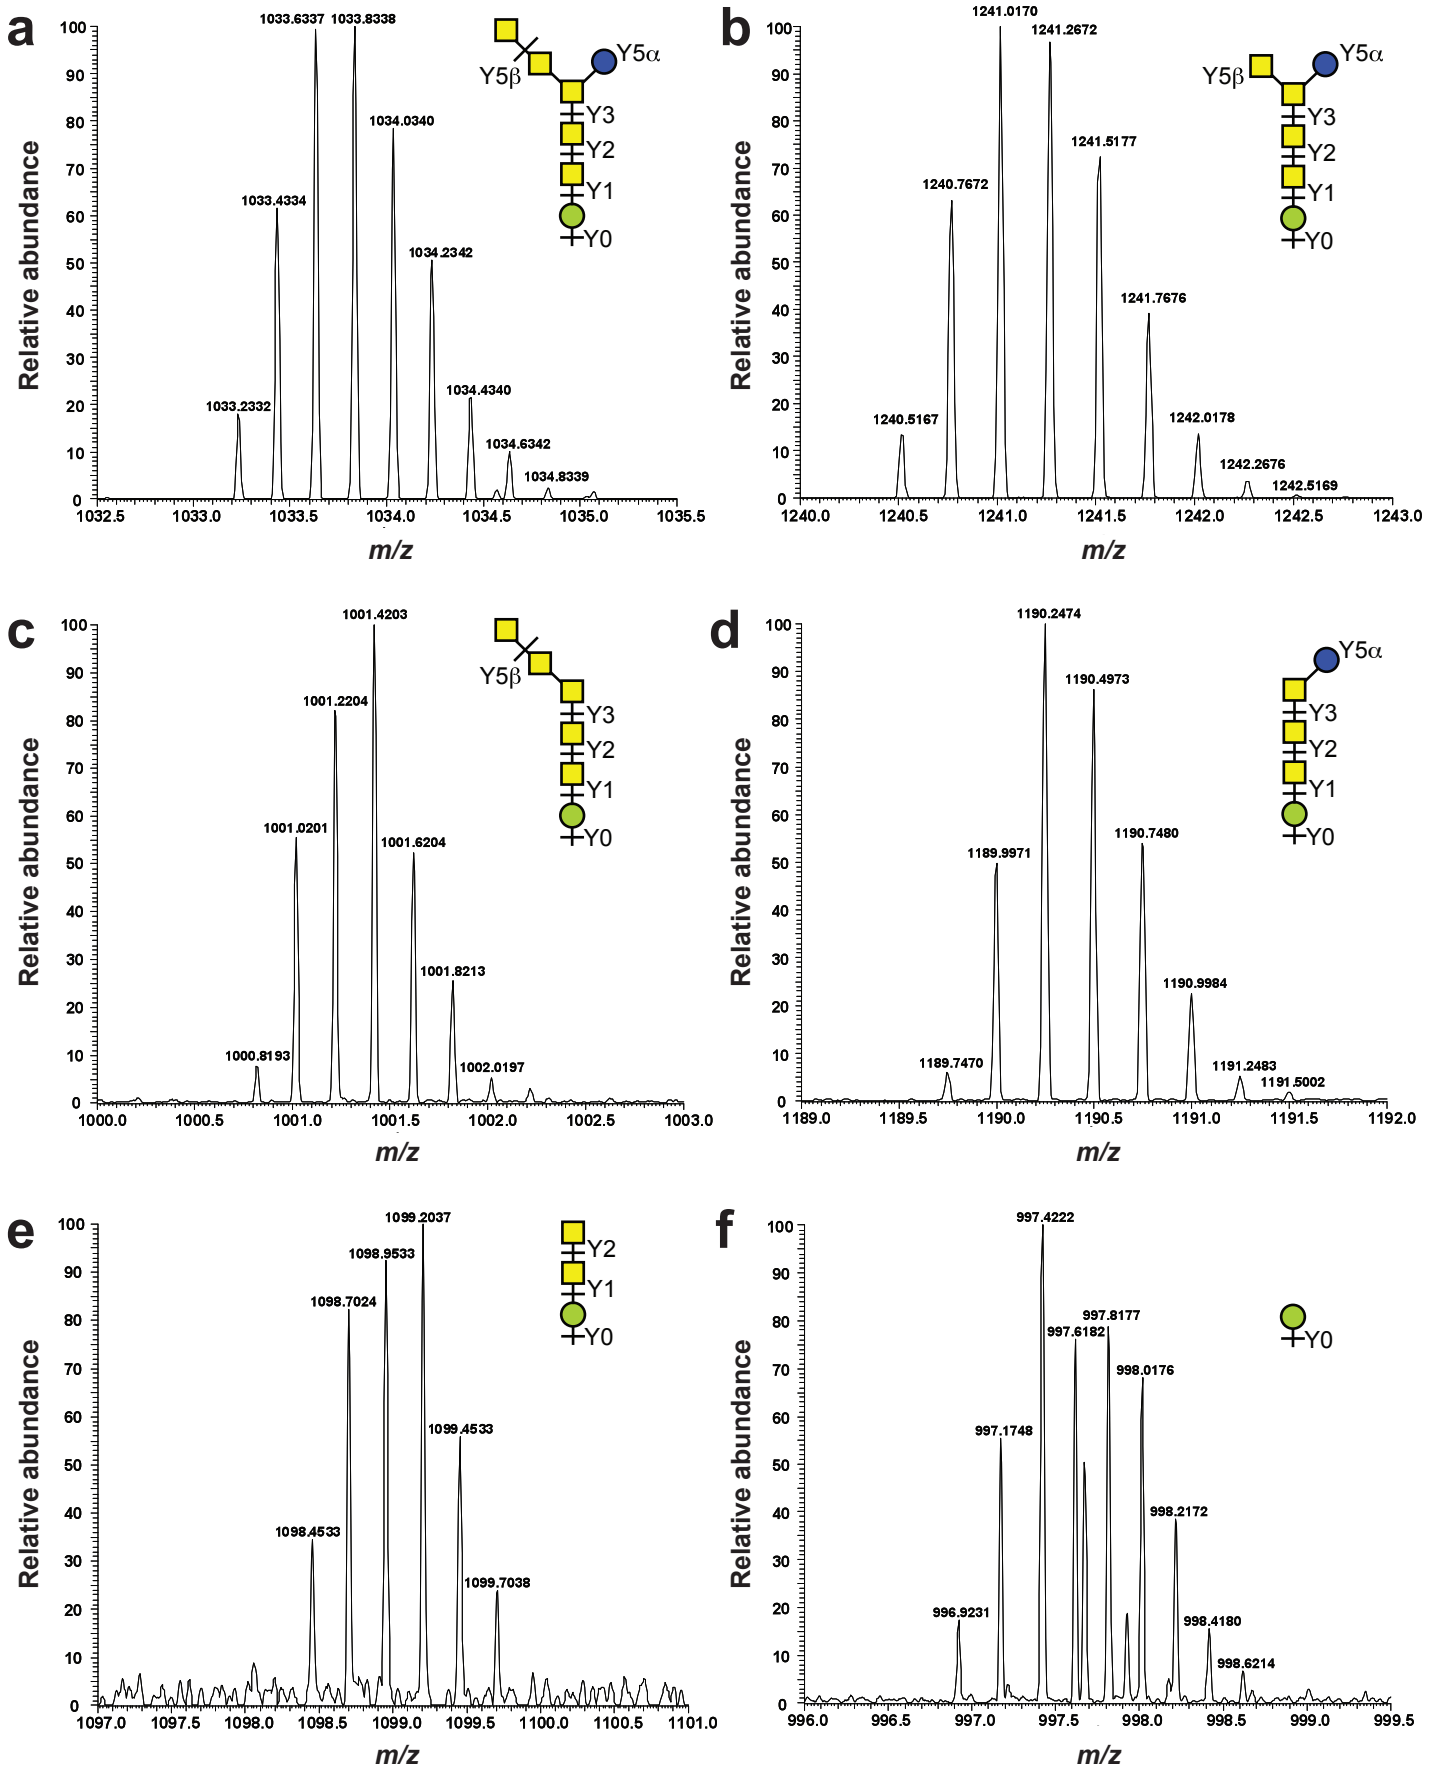

Supplemental Figure S1. Fisher et al.

Supplement: supp_77_3_871__1.pdf [file supp_77_3_871__1.pdf]

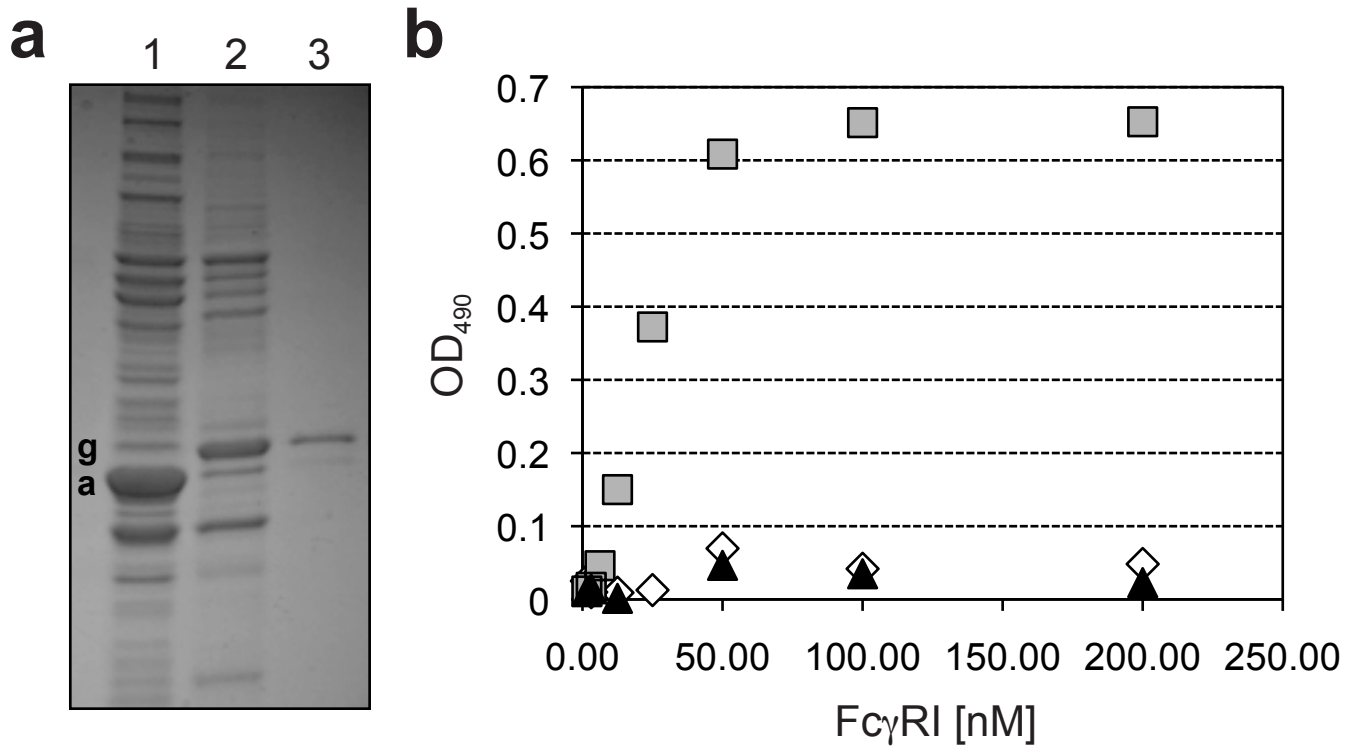

**Supplemental Figure S3. Fisher et al.**

Supplement: supp_77_3_871__3.pdf [file supp_77_3_871__3.pdf]

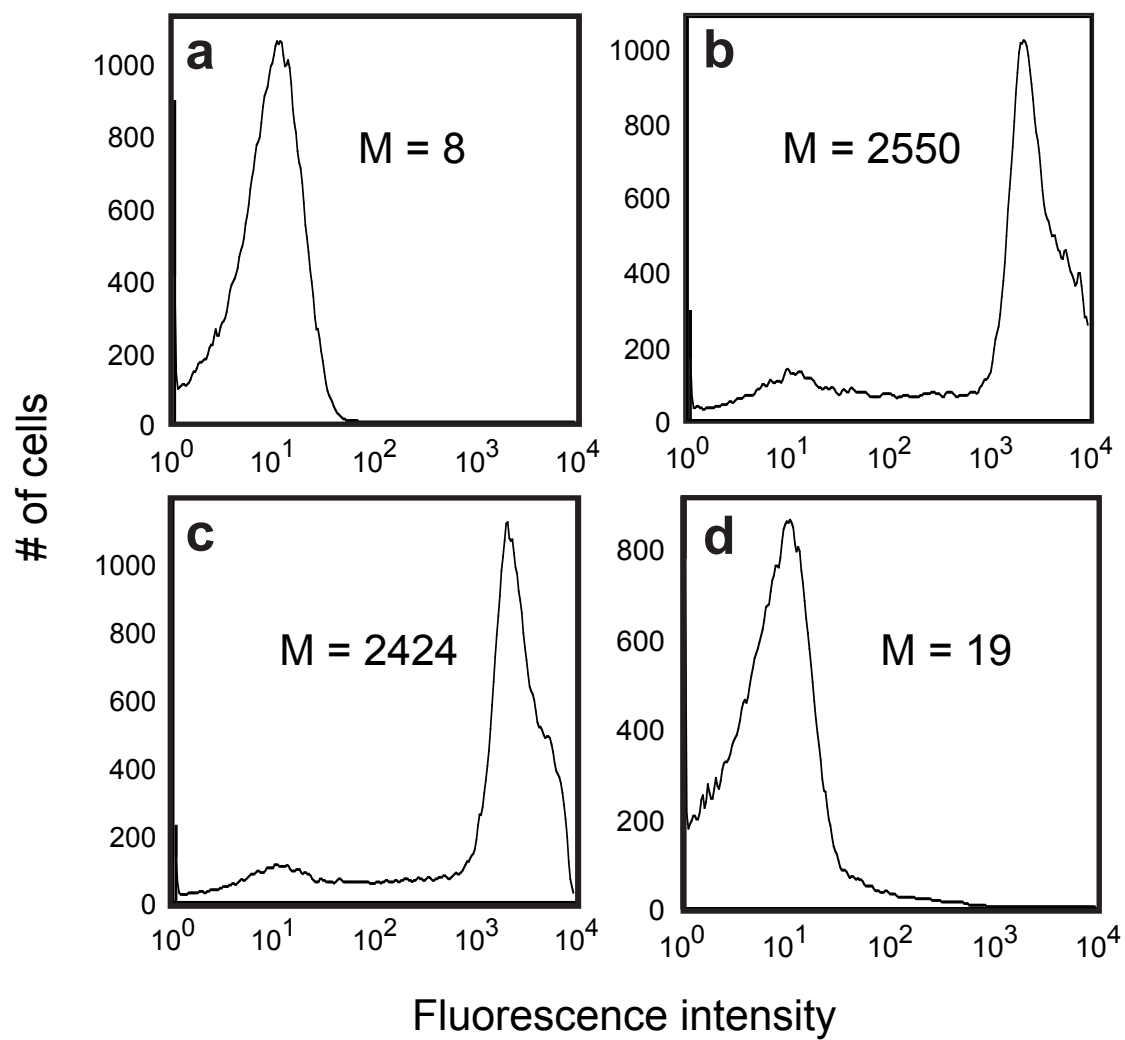

**Supplemental Figure 4. Fisher et al.**

Supplement: supp_77_3_871__4.pdf [file supp_77_3_871__4.pdf]
